# Supplementary material for: Trichoderma from Brazilian garlic and onion crop soils and description of two new species: Trichoderma azevedoi and Trichoderma peberdyi
Source: PubMed Central journal article supplement (PMC7055844; doi:10.1371/journal.pone.0228485), 2020-03-04
Supplement: pone.0228485.s001.pdf [file pone.0228485.s001.pdf]

**S1 Table. Genbank accession numbers of reference strains used for phylogenetic analysis.**

| <b>Species</b>                    | <b>Strain</b> | <b>Type</b> | <b>ACT</b> | <b>CAL</b> | <b>ITS</b> | <b>RPB2</b> | <b>TEF1</b> |
|-----------------------------------|---------------|-------------|------------|------------|------------|-------------|-------------|
| <i>Trichoderma afarasin</i>       | Dis 377A      |             | FJ442562   | KP115277   | FJ442665   | FJ442799    | FJ463322    |
| <i>Trichoderma afarasin</i>       | GJS 99-227    | T           | FJ442536   | FJ442388   | AY027784   | -           | AF348093    |
| <i>Trichoderma afroharzianum</i>  | GJS 00-24     |             | FJ442488   | AF442880   | -          | -           | -           |
| <i>Trichoderma afroharzianum</i>  | GJS 04-186    | T           | FJ442531   | AF442878   | FJ442265   | FJ442691    | FJ463301    |
| <i>Trichoderma aggressivum</i>    | DAOM 222156   | T           | FJ442438   | AF442860   | NG_064979  | FJ442752    | AF348098    |
| <i>Trichoderma alni</i>           | CBS120.633    | T           | -          | EU498326   | EU518651   | EU498349    | EU498312    |
| <i>Trichoderma amazonicum</i>     | IB50          | T           | KC561140   | -          | HM142358   | HM142367    | HM142376    |
| <i>Trichoderma andinense</i>      | GJS 09-62     |             | JN133581   | JN175414   | MH549084   | JN175533    | JN175587    |
| <i>Trichoderma asperelloides</i>  | GJS 04-116    |             | GU248410   | -          | GU198301   | GU248411    | GU248412    |
| <i>Trichoderma asperelloides</i>  | GJS 04-217    |             | DQ333564   | DQ379002   | DQ381957   | -           | DQ381958    |
| <i>Trichoderma asperellum</i>     | CGMCC 6422    |             | GU198251   | -          | KF425754   | KF425755    | KF425756    |
| <i>Trichoderma asperellum</i>     | GJS 91-162    |             | FJ442591   | FJ442414   | FJ442224   | FJ442774    | FJ463285    |
| <i>Trichoderma atrobrunneum</i>   | GJS 90-254    | T           | FJ442525   | AF442883   | NR_137298  | FJ442735    | FJ463397    |
| <i>Trichoderma atroviride</i>     | CBS 142.95    | T           | DQ111971   | DQ122166   | MH862505   | EU341801    | AY376051    |
| <i>Trichoderma austrokonigii</i>  | GJS 99-146    | T           | DQ333551   | DQ379003   | NR_134364  | KJ842161    | DQ307561    |
| <i>Trichoderma breve</i>          | TC736         |             | -          | -          | KY687928   | KY687984    | KY688046    |
| <i>Trichoderma brevicompactum</i> | GJS 04-381    |             | JN133583   | JN133522   | EU330941   | EU338317    | AY937453    |
| <i>Trichoderma brunneoviride</i>  | CBS 120.928   |             | -          | EU498330   | EU518661   | EU498358    | EU498318    |
| <i>Trichoderma camerunense</i>    | GJS 99-230    | T           | FJ442537   | AF442875   | NR_137300  | -           | AF348107    |

|                                  |               |   |          |          |           |           |           |
|----------------------------------|---------------|---|----------|----------|-----------|-----------|-----------|
| <i>Trichoderma capillare</i>     | GJS 99-3      |   | -        | JN175411 | KY225655  | JN175529  | JN175584  |
| <i>Trichoderma caribbaeum</i>    | GJS 98-43     |   | DQ328606 | DQ367673 | DQ313139  | FJ442723. | DQ284976  |
| <i>Trichoderma catoptron</i>     | GJS 02-76     | T | FJ442584 | FJ442387 | AY737766  | AY391900  | AY737726  |
| <i>Trichoderma ceraceum</i>      | GJS 95-159    |   | -        | -        | AF275332  | AF545508  | AF534603  |
| <i>Trichoderma ceramicum</i>     | CBS 114.576   | T | FJ442585 | FJ442401 | AY737764  | AF545510  | AF534593  |
| <i>Trichoderma cerinum</i>       | ATCC MYA-4840 | T | -        | -        | NR_111835 | KJ842184. | AY937443. |
| <i>Trichoderma chlorosporum</i>  | GJS 98-1      |   | FJ442559 | -        | AY737762  | AY391907  | AY737737  |
| <i>Trichoderma cinnamomeum</i>   | GJS 97-237    | T | FJ442582 | JN133524 | AY737759  | AY391920  | KJ871252  |
| <i>Trichoderma citrinoviride</i> | DAOM 172792   | T | -        | JN175419 | EU280098  | EU280036  | EU280098  |
| <i>Trichoderma citrinoviride</i> | GJS 92-8      |   | KR812110 | JN175424 | KR812111  | JN175544  | JN175595  |
| <i>Trichoderma compactum</i>     | YMF1.01693    | T | -        | -        | AY941822  | KP115276  | KF134798  |
| <i>Trichoderma crassum</i>       | GJS 01-227    |   | -        | -        | -         | AY481587  | JN133572. |
| <i>Trichoderma dacrymycellum</i> | WU 29044      |   | -        | -        | FJ860749  | FJ860533  | -         |
| <i>Trichoderma dingleyae</i>     | GJS 02-50     | T | DQ367718 | DQ370461 | DQ333548  | KJ665257  | DQ284978  |
| <i>Trichoderma dorotheae</i>     | GJS 99-202    | T | DQ328603 | DQ367706 | DQ313145  | MH874604  | -         |
| <i>Trichoderma effusum</i>       | DAOM 230007   |   | -        | JN182286 | DQ083008  | KJ665260  | AY937419  |
| <i>Trichoderma endophyticum</i>  | PP89          |   | KP115270 | KP115283 | -         | KP115283  | -         |
| <i>Trichoderma endophyticum</i>  | DIS 217A      |   | FJ442292 | FJ442299 | FJ442243  | FJ442765  | FJ463319  |
| <i>Trichoderma erinaceum</i>     | DAOM 230019   |   | DQ323450 | DQ122163 | AY570797  | EU248603  | -         |
| <i>Trichoderma erinaceum</i>     | GJS 02-103    |   | KR873095 | KR873096 | KR873100  | KR873099  | KR873097  |
| <i>Trichoderma fertile</i>       | DAOM 167161   |   | -        | -        | NR_134336 | AF545546  | AF534618  |

|                                 |            |   |          |          |           |          |          |
|---------------------------------|------------|---|----------|----------|-----------|----------|----------|
| <i>Trichoderma gamsii</i>       | GJS 04-09  |   | JN133590 | JN133529 | DQ315459  | JN133561 | DQ307541 |
| <i>Trichoderma ghanense</i>     | GJS 04-323 |   | JN133591 | JN175443 | NR_120299 | JN175563 | JN175613 |
| <i>Trichoderma gillesii</i>     | GJS 00-72  | T | -        | JN175409 | -         | JN175527 | JN175583 |
| <i>Trichoderma guizhouense</i>  | GJS 06-100 |   | FJ442506 | FJ442343 | DQ018116  | JQ901400 | AY937440 |
| <i>Trichoderma hamatum</i>      | DIS 338A   |   | FJ442806 | -        | FJ442657  | FJ150776 | -        |
| <i>Trichoderma hamatum</i>      | GJS 04-325 |   | EU856267 | FJ442286 | EU856293  | FJ150783 | EU856318 |
| <i>Trichoderma harzianum</i>    | CBS 226.95 | T | FJ442567 | FJ577684 | -         | AF545549 | AF348101 |
| <i>Trichoderma harzianum</i>    | GJS 95-43  |   | AF442831 | AF442864 | -         | -        | -        |
| <i>Trichoderma inhamatum</i>    | CBS 273.78 | T | FJ442561 | AF442891 | MH861134  | FJ44272  | -        |
| <i>Trichoderma intricatum</i>   | GJS 97-88  | T | AY376684 | DQ367680 | NR_134343 | EU241505 | AY376060 |
| <i>Trichoderma konilangbra</i>  | CPK 132    | T | -        | JN182285 | MH862712  | KJ665284 | -        |
| <i>Trichoderma koningii</i>     | CBS979.70  |   | -        | -        | AF359262  | -        | -        |
| <i>Trichoderma koningii</i>     | GJS 89-122 |   | AY376678 | DQ367693 | AY380902  | -        | AY376045 |
| <i>Trichoderma koningiopsis</i> | GJS 04-379 |   | DQ367719 | DQ367702 | DQ323439  | -        | DQ289001 |
| <i>Trichoderma koningiopsis</i> | S359       |   | -        | -        | KC874894  | KJ665285 | KJ665546 |
| <i>Trichoderma koningiopsis</i> | DIS 374A   |   | FJ442597 | FJ442418 | FJ442213  | FJ442730 | FJ463288 |
| <i>Trichoderma koningiopsis</i> | GJS 91-6   |   | DQ323446 | DQ367705 | DQ313135  | -        | DQ307539 |
| <i>Trichoderma lentiforme</i>   | DIS 173D   |   | FJ442443 | FJ442290 | -         | FJ442790 | FJ851882 |
| <i>Trichoderma lentiforme</i>   | DIS 218E   |   | FJ442449 | FJ442296 | FJ442220  | FJ442793 | FJ463310 |
| <i>Trichoderma lentiforme</i>   | DIS 354A   |   | FJ442473 | FJ442317 | FJ442229  | FJ442734 | FJ463339 |
| <i>Trichoderma lentiforme</i>   | GJS 00-22  |   | FJ442487 | AF442861 | -         | FJ442687 | -        |

|                                    |             |   |          |          |           |          |          |
|------------------------------------|-------------|---|----------|----------|-----------|----------|----------|
| <i>Trichoderma linzhiense</i>      | HMAS 248846 | T | -        | -        | NR_154575 | KY687985 | KY688047 |
| <i>Trichoderma lixii</i>           | GJS 97-96   |   | FJ442533 | AF442872 | AF443920  | AF443938 | AF443938 |
| <i>Trichoderma longibrachiatum</i> | CBS 816.68  | T | JX238491 | EU401459 | EU401556  | DQ087242 | AY865640 |
| <i>Trichoderma longibrachiatum</i> | GJS 07-21   |   | -        | JN175393 | -         | JN175513 | JN175569 |
| <i>Trichoderma longipile</i>       | DAOM 177227 | T | JN133592 | JN133534 | AY865630  | AF545550 | AF534622 |
| <i>Trichoderma minutisporum</i>    | DAOM 167069 | T | DQ111977 | DQ122173 | NR_111192 | KJ665314 | KJ665612 |
| <i>Trichoderma neokoningii</i>     | GJS 04-216  |   | -        | -        | DQ841734  | KJ665318 | DQ841718 |
| <i>Trichoderma neotropicale</i>    | CBS 130633  | T | KP115268 | KP115279 | MH865818  | -        | HQ022771 |
| <i>Trichoderma novae-zelandiae</i> | GJS 81-265  |   | JN133595 | JN133536 | DQ083019  | JN133563 | AY937448 |
| <i>Trichoderma oblongisporum</i>   | DAOM 167085 | T | JN133596 | -        | NR_138437 | AF545551 | AF534623 |
| <i>Trichoderma orientale</i>       | GJS 10-230  |   | JQ238613 | JN175403 | EU401550  | JN175523 | JN175579 |
| <i>Trichoderma ovalisporum</i>     | Dis 70A     |   | JQ238613 | DQ379005 | AY380897  | FJ442742 | AY376037 |
| <i>Trichoderma paraviridescens</i> | CBS 119.321 | T | -        | -        | NR_134367 | -        | DQ672610 |
| <i>Trichoderma parepimyces</i>     | CBS 122.769 | T | -        | -        | MH863234  | FJ860562 | FJ860664 |
| <i>Trichoderma petersenii</i>      | GJS 04-164  |   | DQ333566 | DQ367684 | DQ323442  | FJ442783 | DQ289004 |
| <i>Trichoderma piluliferum</i>     | CBS 814.68  | T | -        | -        | AF011935  | AF545519 | AY737747 |
| <i>Trichoderma pinnatum</i>        | GJS 02-120  |   | -        | JN175396 | -         | JN175516 | JN175572 |
| <i>Trichoderma pleuroti</i>        | CBS 124.387 | T | JN133599 | JN133539 | MH863369  | HM142372 | HM142382 |
| <i>Trichoderma pleuroticola</i>    | CBS 124.383 | T | JN133598 | JN133538 | MH863368  | HM142371 | HM142381 |
| <i>Trichoderma polysporum</i>      | CBS 820.68  | T | DQ111976 | DQ122172 | MH859230  | DQ087238 | AY605810 |
| <i>Trichoderma pseudokoningii</i>  | CBS 408.91  | T | -        | -        | MH862258  | AF400740 | -        |

|                                     |             |   |          |          |           |          |          |
|-------------------------------------|-------------|---|----------|----------|-----------|----------|----------|
| <i>Trichoderma pseudokoningii</i>   | GJS 81-300  |   | JN133602 | JN175415 | DQ083025  | JN175534 | AY937429 |
| <i>Trichoderma pubescens</i>        | DAOM 166162 | T | DQ111961 | DQ122153 | NR_077179 | AF545552 | EU279963 |
| <i>Trichoderma pyramidale</i>       | S73         | T | -        | -        | KX632513  | KJ665334 | KJ665699 |
| <i>Trichoderma reesei</i>           | GJS 97-38   |   | -        | JN175432 | AJ004962  | JN175552 | JN175603 |
| <i>Trichoderma rifaii</i>           | DIS 337F    | T | FJ442471 | FJ442315 | FJ442621  | FJ442720 | FJ463321 |
| <i>Trichoderma rifaii</i>           | DIS 355B    |   | FJ442474 | -        | FJ442663  | -        | FJ463324 |
| <i>Trichoderma rogersonii</i>       | GJS 90-78   |   | DQ333558 | DQ370457 | DQ333549  | JN133566 | AF534586 |
| <i>Trichoderma rossicum</i>         | DAOM 230009 | T | JN133605 | JN133548 | HQ342419  | DQ087240 | JN133575 |
| <i>Trichoderma saturnisporopsis</i> | S19         |   | -        | JN175404 | JQ685874  | JQ685885 | JN175580 |
| <i>Trichoderma simmonsii</i>        | GJS 91-138  |   | FJ442526 | AF442869 | MK346240  | FJ442757 | KJ665721 |
| <i>Trichoderma sinense</i>          | DAOM 230004 | T | -        | JN175410 | NR_134425 | JN175528 | KJ713191 |
| <i>Trichoderma solani</i>           | GJS 08-81   |   | -        | JN175426 | -         | JN175546 | JN175597 |
| <i>Trichoderma spirale</i>          | CBS 120.963 |   | FJ442552 | FJ442363 | FJ442363  | -        | FJ463291 |
| <i>Trichoderma spirale</i>          | DAOM 183974 | T | FJ442818 | FJ442395 | NR_077177 | AF545553 | EU280049 |
| <i>Trichoderma stramineum</i>       | GJS 02-84   | T | FJ442583 | FJ442386 | NR_134347 | AY391945 | AY737746 |
| <i>Trichoderma strictipile</i>      | DAOM 167072 |   | FJ442586 | FJ442399 | FJ442219  | KJ842182 | AY937450 |
| <i>Trichoderma strigosum</i>        | DAOM 166121 | T | EU856277 | JN133544 | DQ083027  | AF545556 | EU280019 |
| <i>Trichoderma stromaticum</i>      | GJS 00-02   |   | FJ442603 | HQ342333 | FJ442675  | FJ442714 | FJ463361 |
| <i>Trichoderma taiwanense</i>       | GJS 95-93   | T | DQ323455 | DQ367685 | DQ313141  | JN715608 | DQ284973 |
| <i>Trichoderma tawa</i>             | GJS 97-174  | T | FJ442570 | FJ442406 | AY737756  | KJ842187 | FJ463313 |
| <i>Trichoderma theobromicola</i>    | DIS 85F     | T | DQ111955 | DQ122148 | DQ109525  | FJ150786 | DQ109539 |

|                                |              |   |          |          |           |          |          |
|--------------------------------|--------------|---|----------|----------|-----------|----------|----------|
| <i>Trichoderma tomentosum</i>  | DAOM 178713A | T | JN133612 | -        | NR_134357 | AF545557 | EU279969 |
| <i>Trichoderma tomentosum</i>  | CBS 120.637  |   | -        | -        | FJ860744  | FJ860532 | FJ860629 |
| <i>Trichoderma tomentosum</i>  | TRS82        |   | -        | -        | KP009287  | KP009177 | KP008914 |
| <i>Trichoderma velutinum</i>   | DAOM 230013  |   | JN133614 | JN133550 | -         | JN133569 | AY605803 |
| <i>Trichoderma virens</i>      | GJS 01-287   |   | -        | FJ442404 | DQ083023  | EU341804 | AY750894 |
| <i>Trichoderma viride</i>      | CBS 119.325  | T | -        | -        | NR_138441 | EU711362 | DQ672615 |
| <i>Trichoderma viride</i>      | GJS 90-79    |   | DQ333563 | DQ367707 | DQ381956  | -        | DQ381959 |
| <i>Trichoderma viridescens</i> | CBS 433.34   | T | -        | -        | MH855595  | -        | AF456905 |
