# Supplementary material for: Trichoderma from Brazilian garlic and onion crop soils and description of two new species: Trichoderma azevedoi and Trichoderma peberdyi
Source: PubMed Central journal article supplement (PMC7055844; doi:10.1371/journal.pone.0228485), 2020-03-04
Supplement: pone.0228485.s002.pdf [file pone.0228485.s002.pdf]

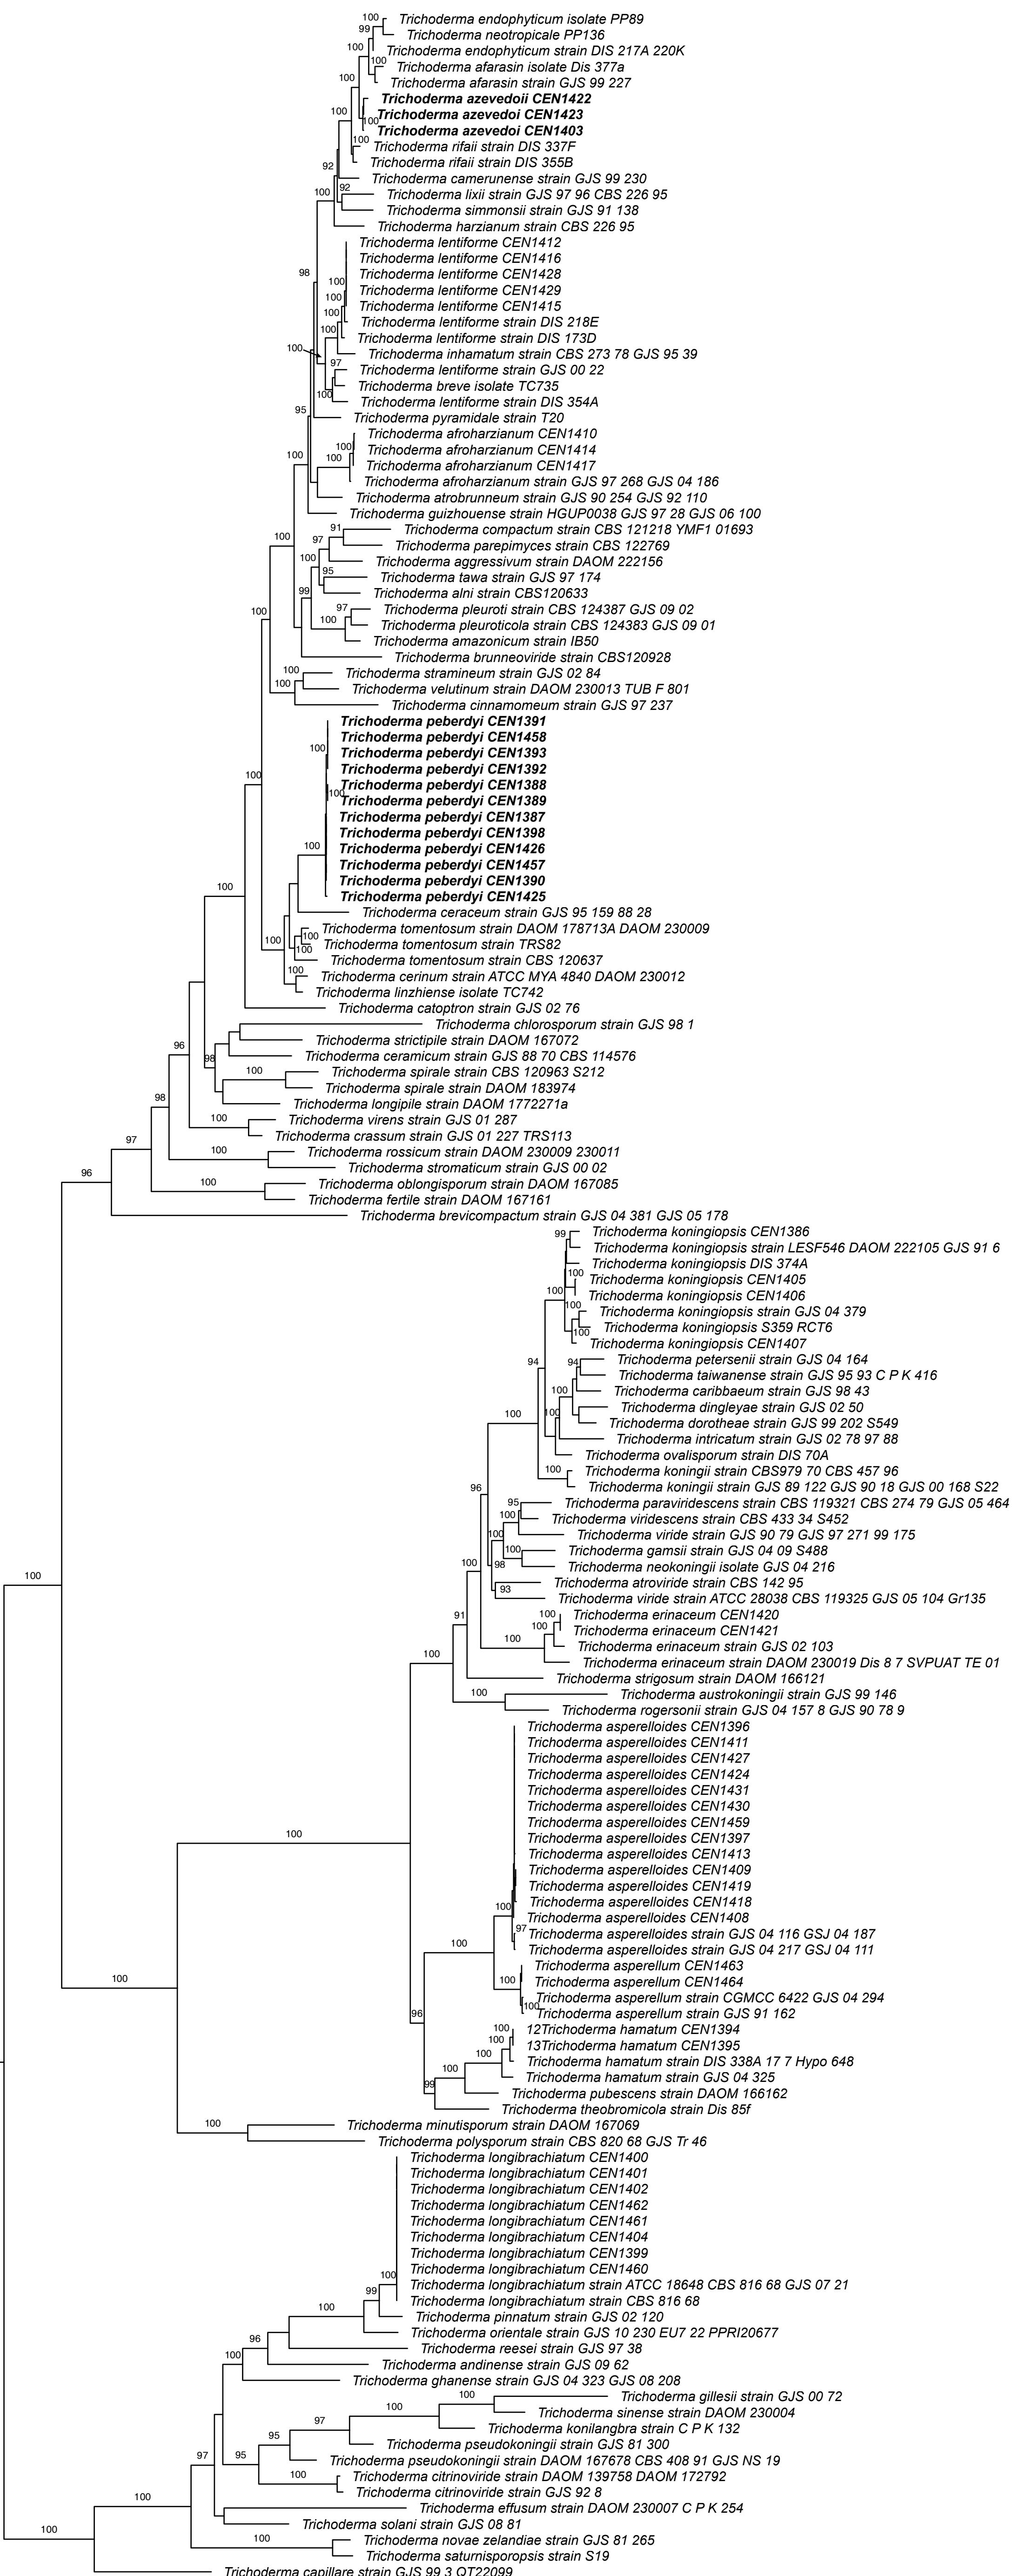

0.07
